# Supplementary material for: The U-Rich Untranslated Region of the Hepatitis E Virus Induces Differential Type I and Type III Interferon Responses in a Host Cell-Dependent Manner
Source: PubMed Central journal article supplement (PMC6960293; doi:10.1128/mbio.03103-19), 2020-01-14

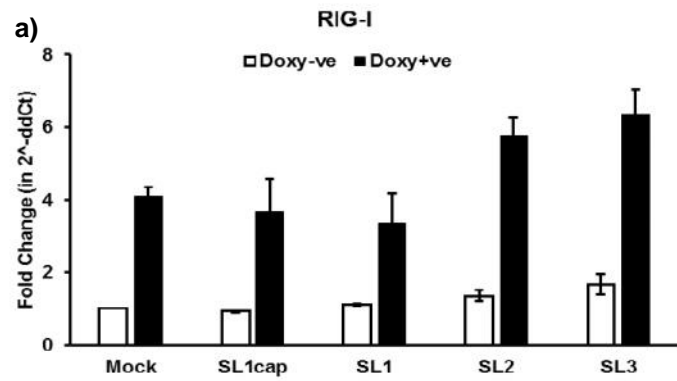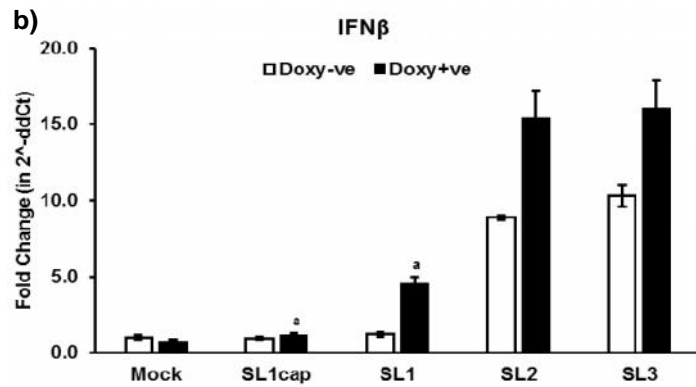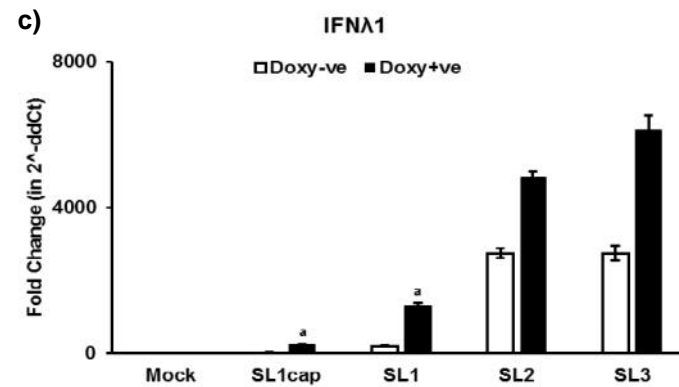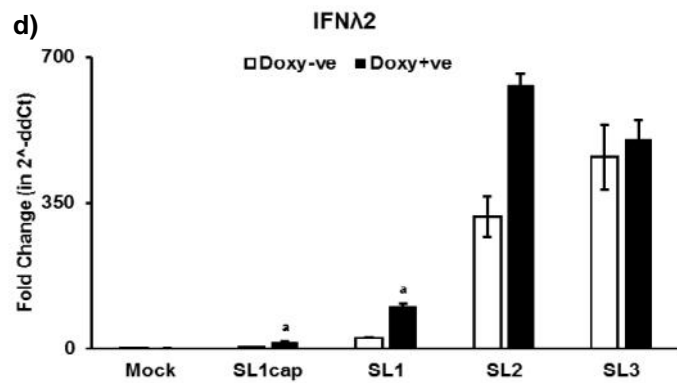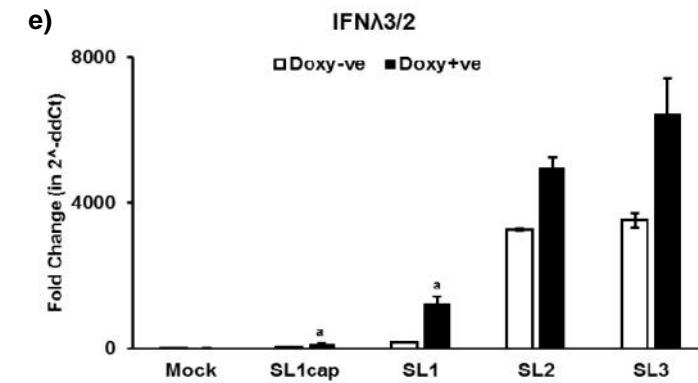

Supplement: mBio.03103-19-sf001.pdf [file mBio.03103-19-sf001.pdf]
